# Supplementary material for: Nasal commensal Staphylococcus epidermidis counteracts influenza virus
Source: PubMed Central journal article supplement (PMC4910069; doi:10.1038/srep27870), 2016-06-16

# Nasal commensal *Staphylococcus epidermidis* counteracts influenza virus

Hui-Wen Chen<sup>1\*</sup>, Pei-Feng Liu<sup>2</sup>, Yu-Tsueng Liu<sup>3,5</sup>, Sherwin Kuo<sup>2</sup>, Xing-Quan Zhang<sup>3</sup>, Robert T. Schooley<sup>3</sup>, Holger Rohde<sup>4</sup>, Richard L. Gallo<sup>2</sup>, and Chun-Ming Huang<sup>2,5 \*</sup>

<sup>1</sup>Department of Veterinary Medicine, National Taiwan University, Taipei, Taiwan

<sup>2</sup>Department of Dermatology, University of California, San Diego, CA, USA

<sup>3</sup>Division of Infectious Diseases, Department of Medicine, University of California, San Diego, CA, USA

<sup>4</sup>Institut für Medizinische Mikrobiologie, Virologie und Hygiene, Universitätsklinikum, Hamburg, Germany

<sup>5</sup>Moore's Cancer Center, University of California, San Diego, CA, USA

**Supplementary Figure S1. The expression of r-Embp and r-isaB.** The construction of *E. coli* over-expressing *S. epidermidis* Embp6599 or isaB was described in Methods. The expression of r-Embp6599 (A) or r-isaB (B) from the *E. coli* was detected in the absence (lane 1) or presence (lane 2) of 0.2% L-arabinose or 1 mM IPTG, respectively. Purified rEmbp6599 or r-isaB (Lane 3) was obtained via a HiTrap chelating HP column or In-Fusion Ready TALON Express Bacterial Expression and Purification kit, respectively.

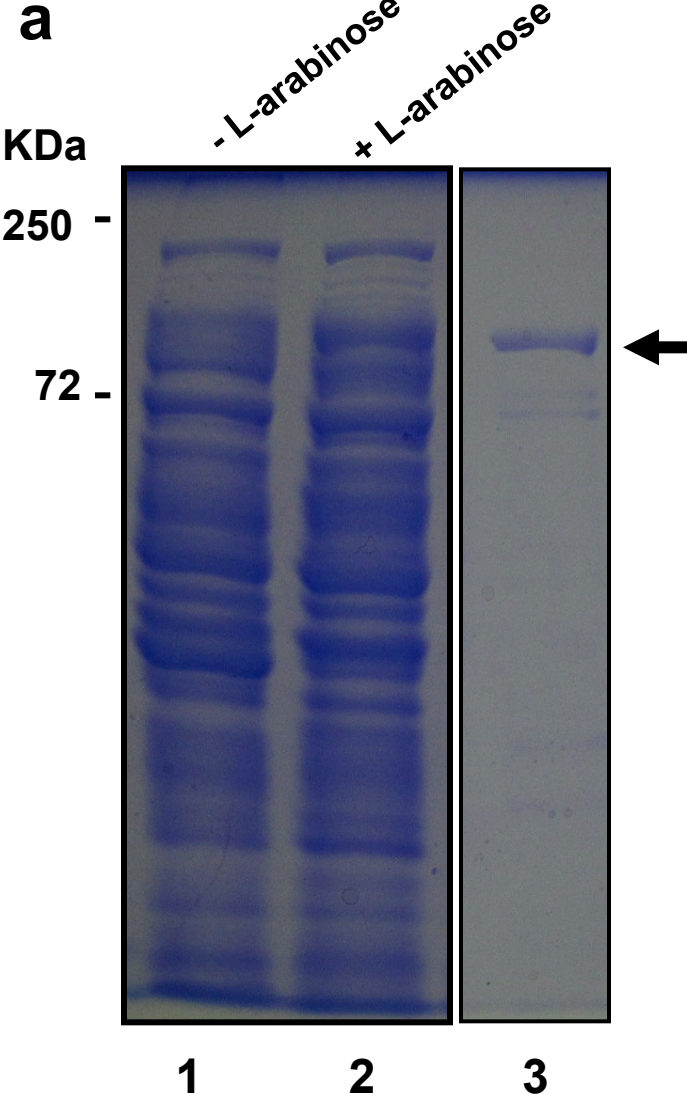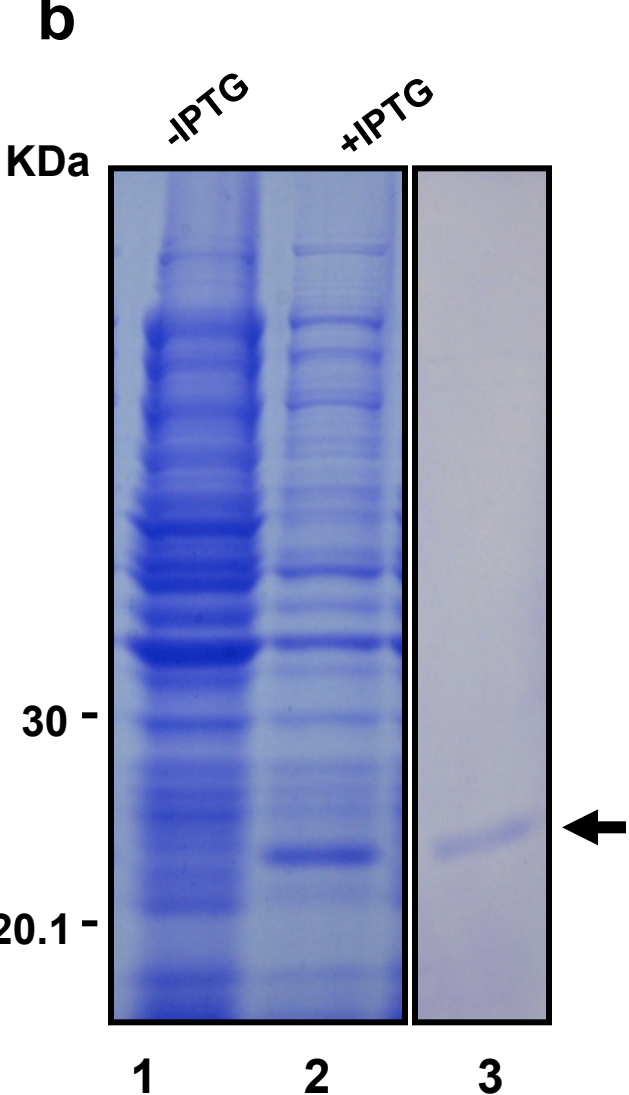

Supplement: srep27870-s1.pdf [file srep27870-s1.pdf]
